# Supplementary material
Source: PubMed Central journal article supplement (PMC4255659)
Supplement: es504253w_si_001.pdf [file es504253w_si_001.pdf]

## Supporting Information

**Table S1. Non-dioxin Products from Pyrolysis of 1,2-Dichlorobenzene and 2-Monochlorophenol Mixtures over CuO/silica Surface. (% yield)**

| Non-dioxin Products |                                    | R   | Reaction Temperature/°C |        |        |         |         |         |         |         |
|---------------------|------------------------------------|-----|-------------------------|--------|--------|---------|---------|---------|---------|---------|
|                     |                                    |     | 200                     | 250    | 300    | 350     | 400     | 450     | 500     | 550     |
| 1                   | Benzene                            | 10  | 0.02                    | 0.03   | 0.07   | 0.08    | 0.11    | 0.10    | 0.10    | 0.04    |
|                     |                                    | 1   | 0.00                    | 0.01   | 0.02   | 0.05    | 0.14    | 0.18    | 0.10    | 0.08    |
|                     |                                    | 0.1 | 0.11                    | 0.3    | 0.33   | 0.27    | 0.28    | 0.19    | 0.20    | 0.12    |
| 2                   | Monochlorobenzene                  | 10  | 4.86                    | 2.12   | 0.88   | 0.47    | 0.38    | 0.17    | 0.25    | 0.28    |
|                     |                                    | 1   | 1.94                    | 0.84   | 0.35   | 0.21    | 0.06    | 0.05    | 0.06    | 0.05    |
|                     |                                    | 0.1 | 0.76                    | 1.40   | 0.89   | 0.81    | 0.77    | 0.52    | 0.46    | 0.30    |
| 3                   | 1,2-Dichlorobenzene                | 10  | 65.04                   | 62.14  | 53.9   | 15.81   | 14.37   | 4.92    | 4.06    | 2.85    |
|                     |                                    | 1   | 54.18                   | 48.72  | 48.29  | 8.08    | 7.62    | 4.17    | 2.44    | 2.85    |
|                     |                                    | 0.1 | 36.63                   | 35.91  | 32.62  | 25.11   | 8.84    | 3.19    | 2.21    | 1.13    |
| 4                   | 1,2,3+1,2,4-TriChlorobenzene       | 10  | 8.35                    | 9.79   | 12.86  | 6.94    | 3.93    | 1.62    | 1.25    | 1.69    |
|                     |                                    | 1   | 2.00                    | 3.63   | 9.98   | 3.46    | 3.50    | 1.90    | 0.60    | 0.91    |
|                     |                                    | 0.1 | 0.69                    | 1.37   | 1.81   | 1.90    | 1.66    | 0.69    | 0.46    | 0.41    |
| 5                   | 1,2,3,4+1,2,3,5-Tetrachlorobenzene | 10  | 0.76                    | 1.18   | 1.43   | 11.70   | 0.80    | 0.53    | 0.31    | 0.30    |
|                     |                                    | 1   | 0.03                    | 0.18   | 1.55   | 0.79    | 0.61    | 0.42    | 0.30    | 0.28    |
|                     |                                    | 0.1 | 0.04                    | 0.66   | 0.81   | 0.85    | 0.92    | 0.5     | 0.28    | 0.11    |
| 6                   | Pentachlorobenzene                 | 10  | 0.046                   | 0.049  | 0.077  | 0.082   | 0.093   | 0.12    | 0.130   | 0.099   |
|                     |                                    | 1   | 0.00                    | 0.088  | 0.098  | 0.170   | 0.180   | 0.29    | 0.062   | 0.00    |
|                     |                                    | 0.1 | 0.00                    | 0.038  | 0.059  | 0.067   | 0.068   | 0.081   | 0.052   | 0.049   |
| 5                   | Hexachlorobenzene                  | 10  | 0.012                   | 0.017  | 0.018  | 0.021   | 0.020   | 0.013   | 0.01    | 0.009   |
|                     |                                    | 1   | 0.000                   | 0.002  | 0.034  | 0.087   | 0.053   | 0.042   | 0.041   | 0.039   |
|                     |                                    | 0.1 | 0.056                   | 0.067  | 0.062  | 0.030   | 0.024   | 0.020   | 0.022   | 0.018   |
| 6                   | Phenol                             | 10  | 0.57                    | 1.2    | 2.26   | 3.29    | 3.17    | 2.63    | 2.51    | 1.99    |
|                     |                                    | 1   | 1.08                    | 1.63   | 1.78   | 2.22    | 1.9     | 1.38    | 0.13    | 0.16    |
|                     |                                    | 0.1 | 1.00                    | 2.84   | 4.98   | 7.67    | 9.77    | 7.08    | 5.94    | 2.33    |
| 7                   | 2-Monochlorophenol                 | 10  | 10.91                   | 6.89   | 2.99   | 1.13    | 1.43    | 1.24    | 1.45    | 0.53    |
|                     |                                    | 1   | 40.55                   | 14.8   | 12.71  | 12.06   | 11.92   | 6.31    | 5.15    | 0.85    |
|                     |                                    | 0.1 | 37.90                   | 30.3   | 21.4   | 14.5    | 10.3    | 6.28    | 6.34    | 4.76    |
| 8                   | 2,4+2,6-Dichlorophenol             | 10  | 0.91                    | 1.64   | 2.58   | 1.49    | 0.97    | 0.75    | 0.73    | 0.76    |
|                     |                                    | 1   | 3.74                    | 4.04   | 8.14   | 2.94    | 1.42    | 1.02    | 1.29    | 0.55    |
|                     |                                    | 0.1 | 1.12                    | 1.63   | 3.48   | 4.78    | 3.43    | 2.82    | 2.93    | 1.78    |
| 9                   | 2,3,6+2,4,6-Trichlorophenol        | 10  | 0.49                    | 0.75   | 1.11   | 1.15    | 0.88    | 0.72    | 0.55    | 0.29    |
|                     |                                    | 1   | 0.57                    | 1.31   | 1.64   | 5.71    | 2.38    | 1.48    | 1.09    | 0.83    |
|                     |                                    | 0.1 | 0.68                    | 2.01   | 3.19   | 0.99    | 0.86    | 0.85    | 0.45    | 0.48    |
| 10                  | Naphthalene                        | 10  | 0.34                    | 0.39   | 0.22   | 0.21    | 0.2     | 0.19    | 0.18    | 0.20    |
|                     |                                    | 1   | 0.44                    | 0.34   | 0.46   | 0.62    | 0.21    | 0.17    | 0.11    | 0.06    |
|                     |                                    | 0.1 | 0.39                    | 1.04   | 0.98   | 1.05    | 1.15    | 0.68    | 0.37    | 0.26    |
| 11                  | Chloronaphthalene                  | 10  |                         |        |        |         |         |         |         |         |
|                     |                                    | 1   |                         |        |        |         |         |         |         |         |
|                     |                                    | 0.1 | 0.100                   | 0.130  | 0.180  | 0.150   | 0.130   | 0.110   | 0.088   | 0.054   |
| 12                  | Biphenyl                           | 10  | 0.006                   | 0.035  | 0.077  | 0.079   | 0.080   | 0.070   | 0.045   | 0.032   |
|                     |                                    | 1   | 0.019                   | 0.063  | 0.095  | 0.130   | 0.130   | 0.120   | 0.032   | 0.038   |
|                     |                                    | 0.1 | 0.026                   | 0.052  | 0.053  | 0.054   | 0.039   | 0.028   | 0.024   | 0.019   |
| 13                  | o-Benzoquinone                     | 10  | 0.011                   | 0.02   | 0.023  | 0.026   | 0.015   | 0.014   | 0.009   | 0.006   |
|                     |                                    | 1   | 0.0047                  | 0.008  | 0.013  | 0.016   | 0.018   | 0.017   | 0.021   | 0.019   |
|                     |                                    | 0.1 | 0.014                   | 0.019  | 0.017  | 0.015   | 0.014   | 0.015   | 0.011   | 0.0039  |
| 14                  | Catechol                           | 10  | 0.0007                  | 0.001  | 0.0011 | 0.0013  | 0.0008  | 0.0007  | 0.00086 | 0.0006  |
|                     |                                    | 1   | 0.00023                 | 0.0012 | 0.0015 | 0.0017  | 0.0012  | 0.00091 | 0.00028 | 0.00049 |
|                     |                                    | 0.1 | 0.0013                  | 0.0014 | 0.0015 | 0.00081 | 0.00077 | 0.00067 | 0.00043 | 0.00038 |

**Table S2. Dioxin Products from Pyrolysis of 1,2-Dichlorobenzene and 2-Monochlorophenol Mixtures over CuO/silica Surface (% yield).**

| Dioxin Products |          | R   | Reaction Temperature/°C |        |       |       |       |       |       |       | Integr. Yields |
|-----------------|----------|-----|-------------------------|--------|-------|-------|-------|-------|-------|-------|----------------|
|                 |          |     | 200                     | 250    | 300   | 350   | 400   | 450   | 500   | 550   |                |
| 1               | DF       | 10  | 0.16                    | 0.15   | 0.2   | 0.21  | 0.23  | 0.22  | 0.12  | 0.14  | 1.43           |
|                 |          | 1   | 0.14                    | 0.2    | 0.24  | 0.26  | 0.27  | 0.29  | 0.3   | 0.26  | 1.96           |
|                 |          | 0.1 | 0.13                    | 0.14   | 0.15  | 0.17  | 0.16  | 0.19  | 0.12  | 0.11  | 1.17           |
| 2               | DD       | 10  | 0.14                    | 0.13   | 0.14  | bdl   | bdl   | bdl   | bdl   | bdl   | 0.41           |
|                 |          | 1   | bdl                     | 0.12   | 0.12  | 0.18  | 0.15  | 0.05  | 0.06  | 0.04  | 0.72           |
|                 |          | 0.1 | 0.05                    | 0.08   | 0.10  | 0.14  | 0.15  | 0.13  | 0.10  | 0.09  | 0.84           |
| 3               | 1-MCDD   | 10  | 0.060                   | 0.0320 | 0.032 | 0.044 | 0.035 | bdl   | bdl   | bdl   | 0.21           |
|                 |          | 1   | 0.006                   | 0.006  | 0.015 | 0.020 | 0.048 | 0.046 | 0.032 | 0.041 | 0.21           |
|                 |          | 0.1 | 0.056                   | 0.063  | 0.091 | 0.070 | 0.062 | 0.056 | 0.048 | 0.046 | 0.49           |
| 4               | 4,6-DCDF | 10  | 0.11                    | 0.22   | 0.20  | 0.25  | 0.12  | 0.11  | 0.09  | 0.07  | 1.17           |
|                 |          | 1   | bdl                     | bdl    | 0.16  | 0.17  | 0.25  | 0.35  | 0.36  | 0.16  | 1.45           |
|                 |          | 0.1 | 0.16                    | 0.17   | 0.12  | 0.11  | 0.1   | 0.09  | 0.06  | 0.09  | 0.90           |

**Table S3. Non-dioxin products from Oxidation of 1,2-Dichlorobenzene and 2-Monochlorophenol Mixtures over CuO/silica surface (% yield).**

| Non-dioxin Products |                                   | R   | Reaction Temperature/°C |       |       |       |       |       |        |        |
|---------------------|-----------------------------------|-----|-------------------------|-------|-------|-------|-------|-------|--------|--------|
|                     |                                   |     | 200                     | 250   | 300   | 350   | 400   | 450   | 500    | 550    |
| 1                   | Benzene                           | 10  | 0.01                    | 0.02  | 0.05  | 0.05  | 0.08  | 0.10  | 0.07   | 0.07   |
|                     |                                   | 1   | 0.01                    | 0.06  | 0.06  | 0.06  | 0.09  | 0.11  | 0.09   | 0.05   |
|                     |                                   | 0.1 | 0.09                    | 0.11  | 0.17  | 0.20  | 0.12  | 0.09  | 0.09   | 0.07   |
| 2                   | Monochlorobenzene                 | 10  | 1.61                    | 1.43  | 1.04  | 0.83  | 0.24  | 0.11  | 0.13   | 0.10   |
|                     |                                   | 1   | 1.77                    | 1.08  | 0.42  | 0.23  | 0.06  | 0.03  | 0.04   | 0.03   |
|                     |                                   | 0.1 | 1.33                    | 1.12  | 0.92  | 0.75  | 0.62  | 0.44  | 0.28   | 0.16   |
| 3                   | 1,2-Dichlorobenzene               | 10  | 51.78                   | 40.68 | 25.64 | 8.87  | 6.11  | 5.59  | 2.54   | 1.49   |
|                     |                                   | 1   | 48.22                   | 31.97 | 19.36 | 7.78  | 4.65  | 3.28  | 3.76   | 0.95   |
|                     |                                   | 0.1 | 34.16                   | 23.82 | 12.09 | 8.04  | 5.77  | 4.04  | 2.41   | 1.37   |
| 4                   | 1,2,3+1,2,4-TriChlorobenzene      | 10  | 3.35                    | 3.94  | 5.42  | 6.10  | 3.27  | 3.37  | 1.26   | 0.81   |
|                     |                                   | 1   | 1.71                    | 2.92  | 3.02  | 3.39  | 4.23  | 2.14  | 1.32   | 0.34   |
|                     |                                   | 0.1 | 1.65                    | 2.49  | 3.21  | 3.17  | 2.68  | 1.26  | 0.79   | 0.38   |
| 5                   | 1,2,3,4+1,2,3,5-Tetrachlorobenzne | 10  | 0.05                    | 0.08  | 0.72  | 3.26  | 4.09  | 2.18  | 0.62   | 0.16   |
|                     |                                   | 1   | 0.03                    | 0.09  | 0.51  | 1.22  | 1.15  | 1.42  | 0.62   | 0.24   |
|                     |                                   | 0.1 | 0.02                    | 0.04  | 0.57  | 0.91  | 1.38  | 1.15  | 0.48   | 0.11   |
| 6                   | Pentachlorobenzene                | 10  | 0.011                   | 0.014 | 0.049 | 0.18  | 0.30  | 0.17  | 0.073  | 0.026  |
|                     |                                   | 1   | bdl                     | bdl   | bdl   | 0.069 | 0.085 | 0.38  | 0.24   | 0.019  |
|                     |                                   | 0.1 | bdl                     | bdl   | 0.033 | 0.180 | 0.240 | 0.100 | 0.062  | 0      |
| 7                   | Hexachlorobenzene                 | 10  | bdl                     | 0.037 | 0.034 | 0.049 | 0.081 | 0.074 | 0.078  | 0.010  |
|                     |                                   | 1   | bdl                     | bdl   | 0.024 | 0.080 | 0.072 | 0.048 | 0.055  | 0.012  |
|                     |                                   | 0.1 | bdl                     | 0.019 | 0.041 | 0.058 | 0.043 | 0.018 | 0.0098 | 0.0077 |
| 8                   | Phenol                            | 10  | 1.31                    | 1.47  | 2.88  | 6.32  | 2.58  | 2.37  | 2.49   | 1.27   |
|                     |                                   | 1   | 1.08                    | 1.83  | 1.79  | 4.58  | 8.65  | 14.17 | 4.56   | 1.02   |
|                     |                                   | 0.1 | 1.48                    | 2.97  | 3.06  | 5.15  | 16.02 | 9.92  | 3.45   | 3.08   |
| 9                   | 2-Monochlorophenol                | 10  | 18.24                   | 12.04 | 3.46  | 1.83  | 1.19  | 1.26  | 0.98   | 0.64   |
|                     |                                   | 1   | 21.67                   | 17.82 | 4.12  | 2.65  | 2.34  | 1.43  | 0.62   | 0.51   |
|                     |                                   | 0.1 | 17.68                   | 16.75 | 9.77  | 3.13  | 3.24  | 2.88  | 2.04   | 2.14   |
| 10                  | 2,4+2,6-Dichlorophenol            | 10  | 0.76                    | 1.57  | 2.31  | 2.42  | 1.09  | 1.14  | 0.81   | 0.61   |
|                     |                                   | 1   | 1.71                    | 5.45  | 6.03  | 3.29  | 1.34  | 1.39  | 0.72   | 0.77   |
|                     |                                   | 0.1 | 1.41                    | 4.01  | 5.27  | 3.18  | 2.98  | 3.04  | 1.62   | 1.44   |
| 11                  | 2,3,6+2,4,6-Trichlorophenol       | 10  | 0.54                    | 0.68  | 1.13  | 1.74  | 2.83  | 2.54  | 1.62   | 0.81   |
|                     |                                   | 1   | 0.43                    | 0.73  | 0.92  | 1.88  | 2.34  | 1.81  | 0.77   | 0.8    |
|                     |                                   | 0.1 | 0.95                    | 0.86  | 1.26  | 3.23  | 3.07  | 1.95  | 1.46   | 1.22   |
| 12                  | Naphthalene                       | 10  | 0.13                    | 0.41  | 0.61  | 0.36  | 0.78  | 0.44  | 0.51   | 0.23   |
|                     |                                   | 1   | 0.35                    | 0.46  | 0.49  | 0.59  | 0.67  | 0.91  | 0.72   | 0.57   |
|                     |                                   | 0.1 | 0.21                    | 0.91  | 0.84  | 0.93  | 1.38  | 1.17  | 0.74   | 0.33   |
| 13                  | Chloronaphthalene                 | 10  | 0.000                   | 0.000 | 0.000 | 0.210 | 0.370 | 0.000 | 0.000  | 0.000  |
|                     |                                   | 1   | 0.000                   | 0.016 | 0.043 | 0.068 | 0.110 | 0.056 | 0.000  | 0.000  |
|                     |                                   | 0.1 | 0.001                   | 0.006 | 0.016 | 0.091 | 0.280 | 0.067 | 0.042  | 0.018  |
| 14                  | Biphenyl                          | 10  | 0.007                   | 0.011 | 0.033 | 0.071 | 0.061 | 0.034 | 0.013  | 0.008  |
|                     |                                   | 1   | 0.027                   | 0.039 | 0.080 | 0.140 | 0.230 | 0.110 | 0.091  | 0.025  |
|                     |                                   | 0.1 | 0.035                   | 0.031 | 0.052 | 0.220 | 0.083 | 0.044 | 0.016  | 0.010  |
| 15                  | o-Benzoquinone                    | 10  | 0.009                   | 0.009 | 0.012 | 0.035 | 0.008 | 0.006 | 0.003  | 0.002  |
|                     |                                   | 1   | 0.007                   | 0.016 | 0.063 | 0.018 | 0.008 | 0.004 | 0.002  | 0.000  |
|                     |                                   | 0.1 | 0.010                   | 0.018 | 0.083 | 0.076 | 0.011 | 0.007 | 0.004  | 0.001  |
| 16                  | Catechol                          | 10  | 0.003                   | 0.003 | 0.005 | 0.001 | 0.001 | 0.000 | 0.000  | 0.000  |
|                     |                                   | 1   | 0.001                   | 0.002 | 0.007 | 0.005 | 0.002 | 0.002 | 0.001  | 0.000  |
|                     |                                   | 0.1 | 0.007                   | 0.007 | 0.009 | 0.004 | 0.002 | 0.001 | 0.001  | 0.000  |

**Table S4. Dioxin Products from Oxidation of 1,2-Dichlorobenzene and 2-Monochlorophenol Mixtures over CuO/silica surface (% yield).**

| Dioxin Products |          | R   | Reaction Temperature/°C |       |       |       |       |       |       | Integr. Yields |       |
|-----------------|----------|-----|-------------------------|-------|-------|-------|-------|-------|-------|----------------|-------|
|                 |          |     | 200                     | 250   | 300   | 350   | 400   | 450   | 500   |                | 550   |
| 1               | DF       | 10  | 0.19                    | 0.21  | 0.23  | 0.29  | 0.32  | 0.4   | 0.51  | 0.16           | 2.31  |
|                 |          | 1   | 0.27                    | 0.25  | 0.33  | 0.42  | 0.56  | 0.47  | 0.28  | 0.22           | 2.80  |
|                 |          | 0.1 | 0.21                    | 0.2   | 0.19  | 0.28  | 0.33  | 0.26  | 0.2   | 0.18           | 1.85  |
| 2               | DD       | 10  | 0.045                   | 0.057 | 0.065 | 0.072 | 0.12  | 0.16  | 0.083 | 0.071          | 0.673 |
|                 |          | 1   | 0.093                   | 0.11  | 0.18  | 0.23  | 0.28  | 0.16  | 0.18  | 0.12           | 1.353 |
|                 |          | 0.1 | 0.077                   | 0.15  | 0.14  | 0.29  | 0.31  | 0.24  | 0.11  | 0.1            | 1.417 |
| 3               | 1-MCDD   | 10  | 0.006                   | 0.008 | 0.230 | 0.210 | 0.170 | 0.098 | 0.007 | 0.007          | 0.747 |
|                 |          | 1   | 0.000                   | 0.006 | 0.160 | 0.310 | 0.210 | 0.100 | 0.004 | 0.000          | 0.790 |
|                 |          | 0.1 | 0.005                   | 0.010 | 0.360 | 0.370 | 0.190 | 0.200 | 0.006 | 0.003          | 1.144 |
| 4               | 4,6-DCDF | 0.1 | 0.23                    | 0.36  | 0.33  | 0.16  | 0.17  | 0.17  | 0.14  | 0.11           | 1.67  |
|                 |          | 1   | 0.17                    | 0.22  | 0.41  | 0.34  | 0.2   | 0.18  | 0.19  | 0.12           | 1.83  |
|                 |          | 10  | 0.00                    | 0.19  | 0.28  | 0.31  | 0.22  | 0.2   | 0.11  | 0.14           | 1.45  |
